# Supplementary material for: Plastome Phylogenomics of Aucuba (Garryaceae)
Source: Front Genet. 2022 Jan 24;13:753719. doi: 10.3389/fgene.2022.753719 (PMC8819091; doi:10.3389/fgene.2022.753719)
Supplement: Supplementary file 4 [file Table1.XLSX]

## Sheet: Sheet1
Table S2 Information for 68 CDS used in partitioned phylogenetic analysis and divergence time estimation.
CDS name	Alignment length	Number of unique site patterns	Number of parsimony-informative sites	Best fit model
accD	1585	297	134	TVM+F+I
atpA	1524	148	97	TVM+F+I
atpB	1497	133	77	TIM+F+G4
atpE	402	52	29	K3Pu+F+I
atpF	636	93	34	TPM3+F+G4
atpH	246	30	12	K2P+I
atpI	744	82	39	K3Pu+F+G4
ccsA	966	214	106	TVM+F+G4
cemA	698	108	45	TVM+F+I
infA	249	46	8	TPM3+F+I
matK	1546	291	182	TVM+F+G4
ndhA	1092	126	73	TVM+F+G4
ndhB	1533	40	14	K3Pu+F
ndhC	363	50	15	TVM+F
ndhD	1530	208	154	K3Pu+F+G4
ndhE	306	52	23	TVM+F+G4
ndhF	2277	381	249	TVM+F+G4
ndhG	531	98	46	TPM3+F+G4
ndhH	1182	132	92	TVM+F+R2
ndhI	537	99	40	K3Pu+F+I
ndhJ	477	51	15	TPM3+F
ndhK	855	108	34	TPM3+F+I
petA	963	109	47	K3Pu+F+R2
petL	96	20	6	K2P+G4
petN	90	12	3	JC
psaA	2253	156	92	K3Pu+F+I
psaB	2205	143	99	K3Pu+F+I
psaC	246	38	17	K2P+I
psaI	111	22	5	K3Pu+F
psaJ	135	26	8	K2P
psbA	1062	68	37	K3Pu+F+I
psbB	1527	125	80	K3Pu+F+I
psbC	1422	106	65	K3Pu+F+R2
psbD	1062	66	31	TN+F+I
psbE	252	24	8	K2P+I
psbF	120	16	3	K2P
psbH	222	37	9	HKY+F
psbI	156	23	8	HKY+F+I
psbJ	123	11	2	F81+F
psbK	192	45	12	TVM+F+G4
psbL	117	15	3	HKY+F
psbM	153	24	5	HKY+F+G4
psbN	132	17	4	K2P
psbT	117	24	2	HKY+F
rbcL	1455	145	85	TPM3+F+R2
rpl14	369	45	17	HKY+F+I
rpl2	849	48	9	HKY+F
rpl20	396	91	29	K3Pu+F+I
rpl22	486	154	62	TPM3+F+G4
rpl23	282	23	3	F81+F
rpl32	181	56	21	TN+F+I
rpl33	207	48	16	K2P+I
rpl36	114	16	4	JC
rpoA	1082	177	88	TVM+F+G4
rpoB	3216	199	161	TVM+F+G4
rpoC1	2082	177	110	TVM+F+G4
rpoC2	4226	423	322	GTR+F+G4
rps11	441	81	33	TNe+G4
rps14	303	43	20	K3Pu+F+G4
rps15	273	86	41	TPM3+F+I
rps18	408	82	16	TPM3+F+I
rps19	285	60	19	K3Pu+F+I
rps2	843	96	45	TPM3+F+G4
rps3	660	112	61	TPM3+F+G4
rps4	609	86	31	TPM3+F+G4
rps8	411	77	38	K3Pu+F+G4
ycf2	7463	411	174	TVM+F+I
ycf4	555	76	32	K3Pu+F
